# Supplementary material for: Benoxazolone-based ionic liquid catalyzed C–S bond construction for synthesis of benzothiazoles from 2-aminothiophenols and CO2 under ambient conditions
Source: Royal Society of Chemistry journal article supplement (doi:10.1039/d3nj03333c), 2023-01-01
Supplement: d3nj03333c1.pdf [file d3nj03333c1.pdf]

## Supporting Information

# Benoxazolone-based Ionic Liquid Catalyzed C-S Bond Construction to Synthesis of Benzothiazoles from 2-aminothiophenols and CO<sub>2</sub> at Ambient Conditions

Xiang Gao<sup>\*a</sup>, Jiajia Zhao<sup>a</sup>, Ying Gao<sup>\*b</sup>, Yuchua Deng<sup>a</sup>, Yi Shi<sup>a</sup>, Jia He<sup>a</sup>, Yanrui Li<sup>\*c</sup>

<sup>a</sup> College of Geology and Environment, Xi'an University of Science and Technology, Xi'an 710054, China.

<sup>b</sup> Department of Teaching Quality Evaluation, Yan'an University, Yan'an 716000, China. <sup>c</sup> College of

Materials Science and Engineering, Xi'an University of Science and Technology, Xi'an, 710054, China.

\*Correspondence: gaoxiang@iccas.ac.cn (X. G.); gaoying200777@126.com (Y. G.); liyanrui91@xust.edu.cn (Y. R. Li.)

## This file includes:

1. <sup>1</sup>H and <sup>13</sup>C NMR spectra of the as-synthesized ILs, Figure S1-S5.
2. <sup>1</sup>H and <sup>13</sup>C NMR spectra of the products, Figure S6-S13.

1.  $^1\text{H}$  and  $^{13}\text{C}$  NMR spectra of as-synthesized ILs, Figure S1-S5

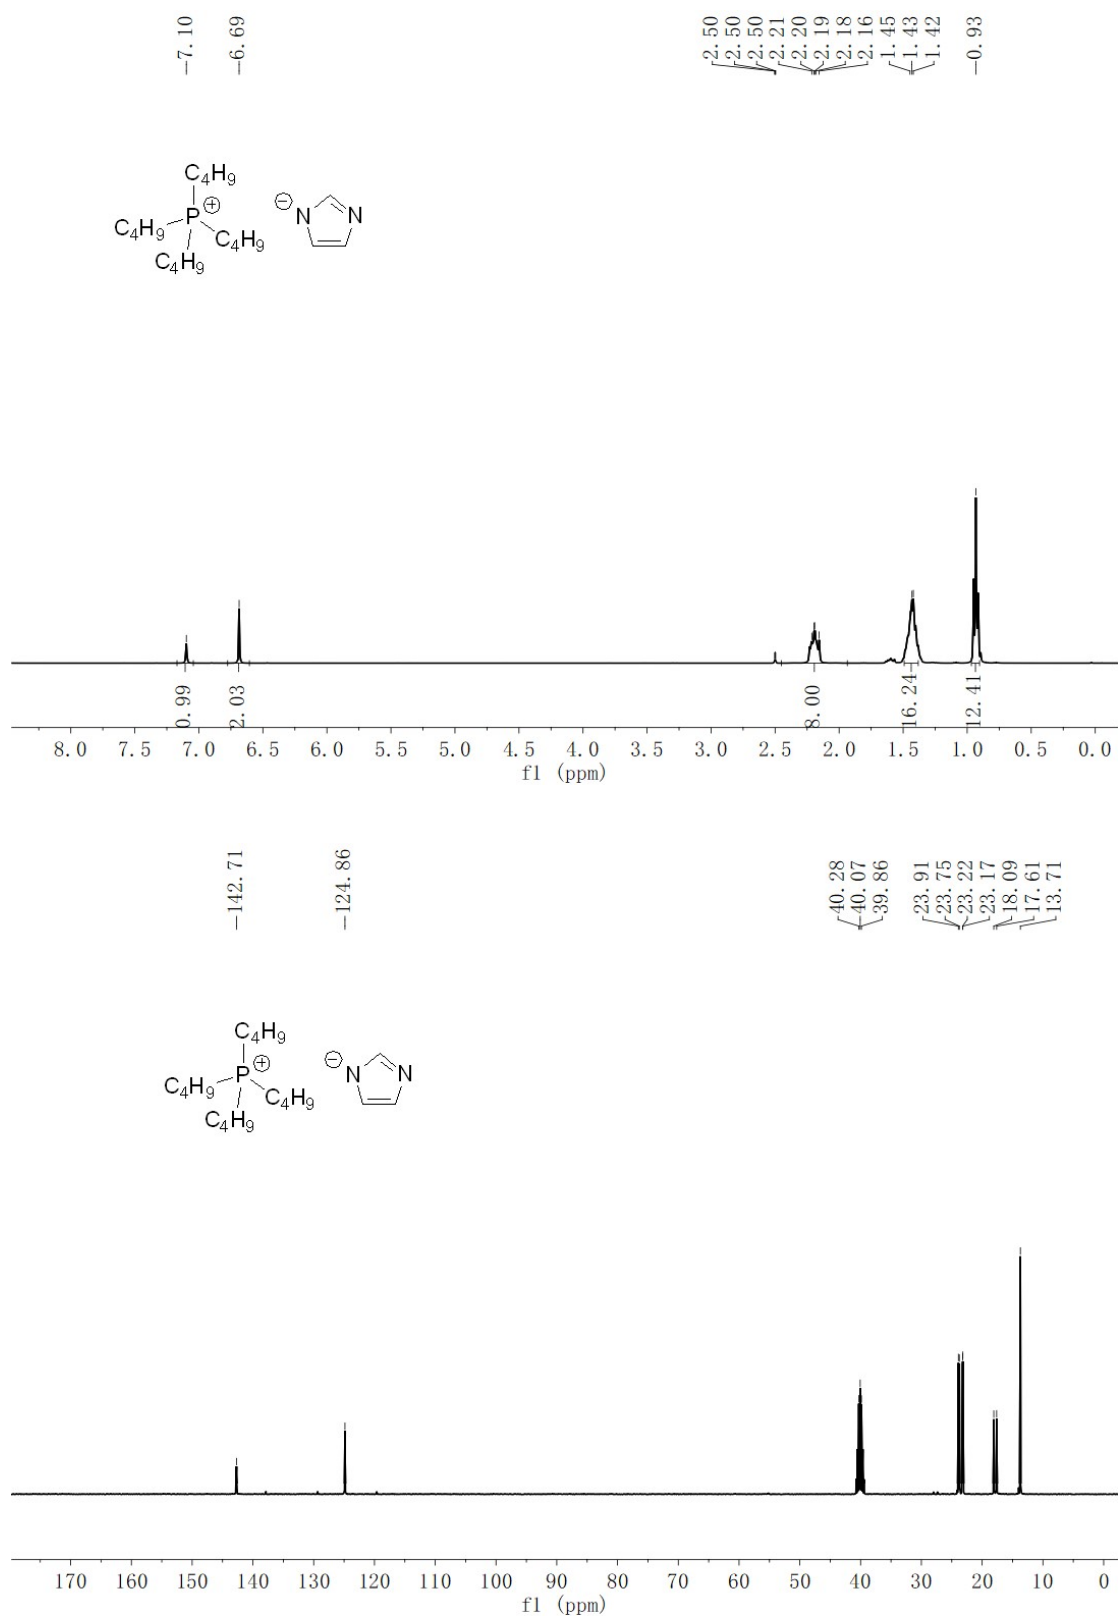

Figure S1.  $^1\text{H}$  NMR and  $^{13}\text{C}$  NMR spectra of  $[\text{P}_{4444}][\text{Im}]$

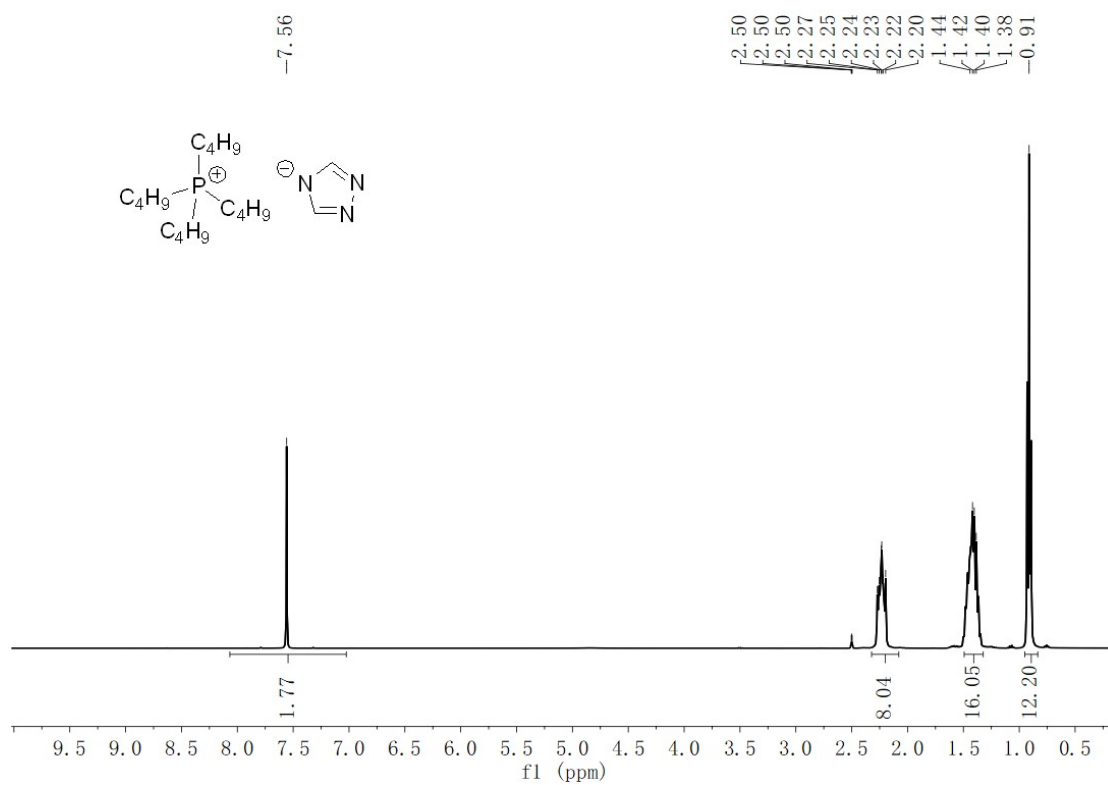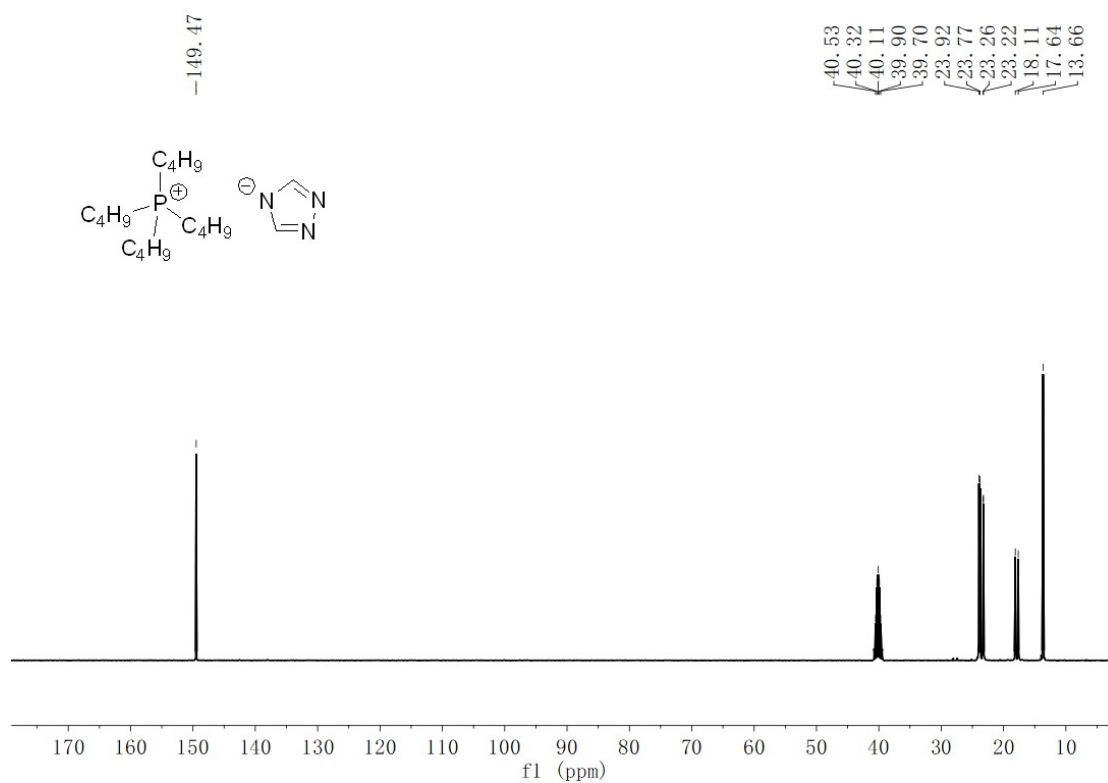

**Figure S2.** <sup>1</sup>H NMR and <sup>13</sup>C NMR spectra of [P<sub>4444</sub>][Triz]

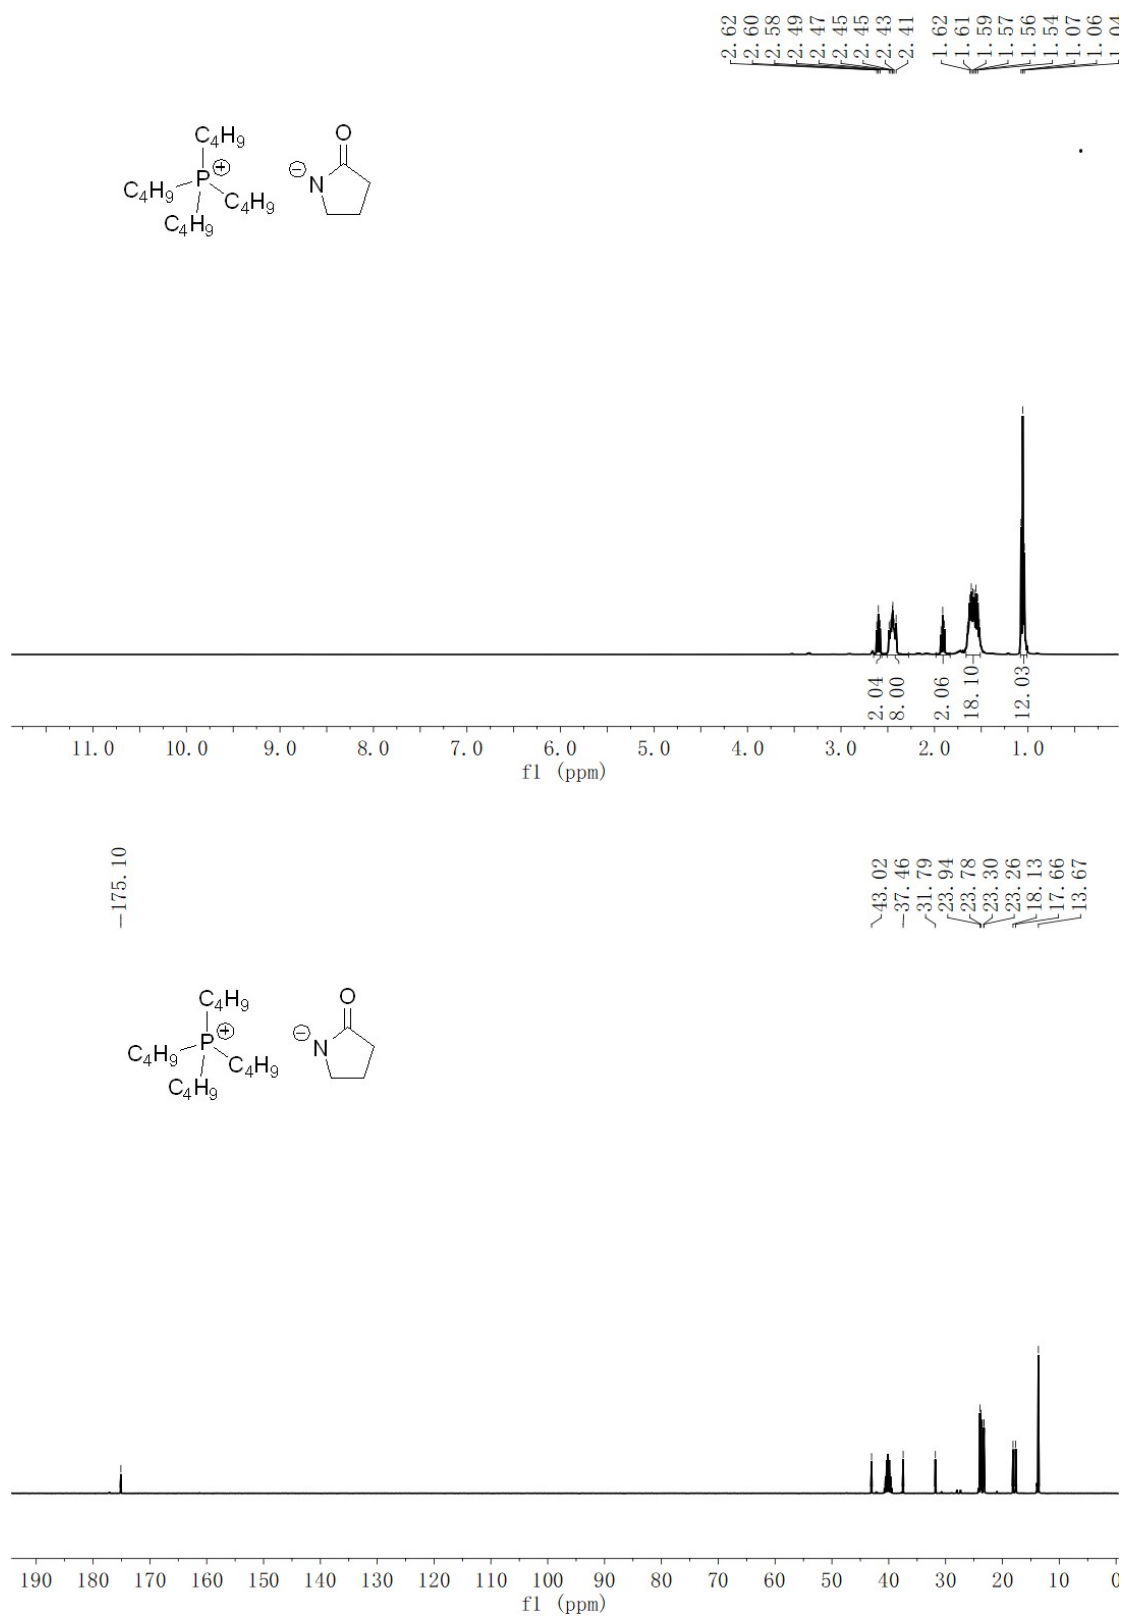

**Figure S3.** <sup>1</sup>H NMR and <sup>13</sup>C NMR spectra of [P<sub>4444</sub>][Pyrr]

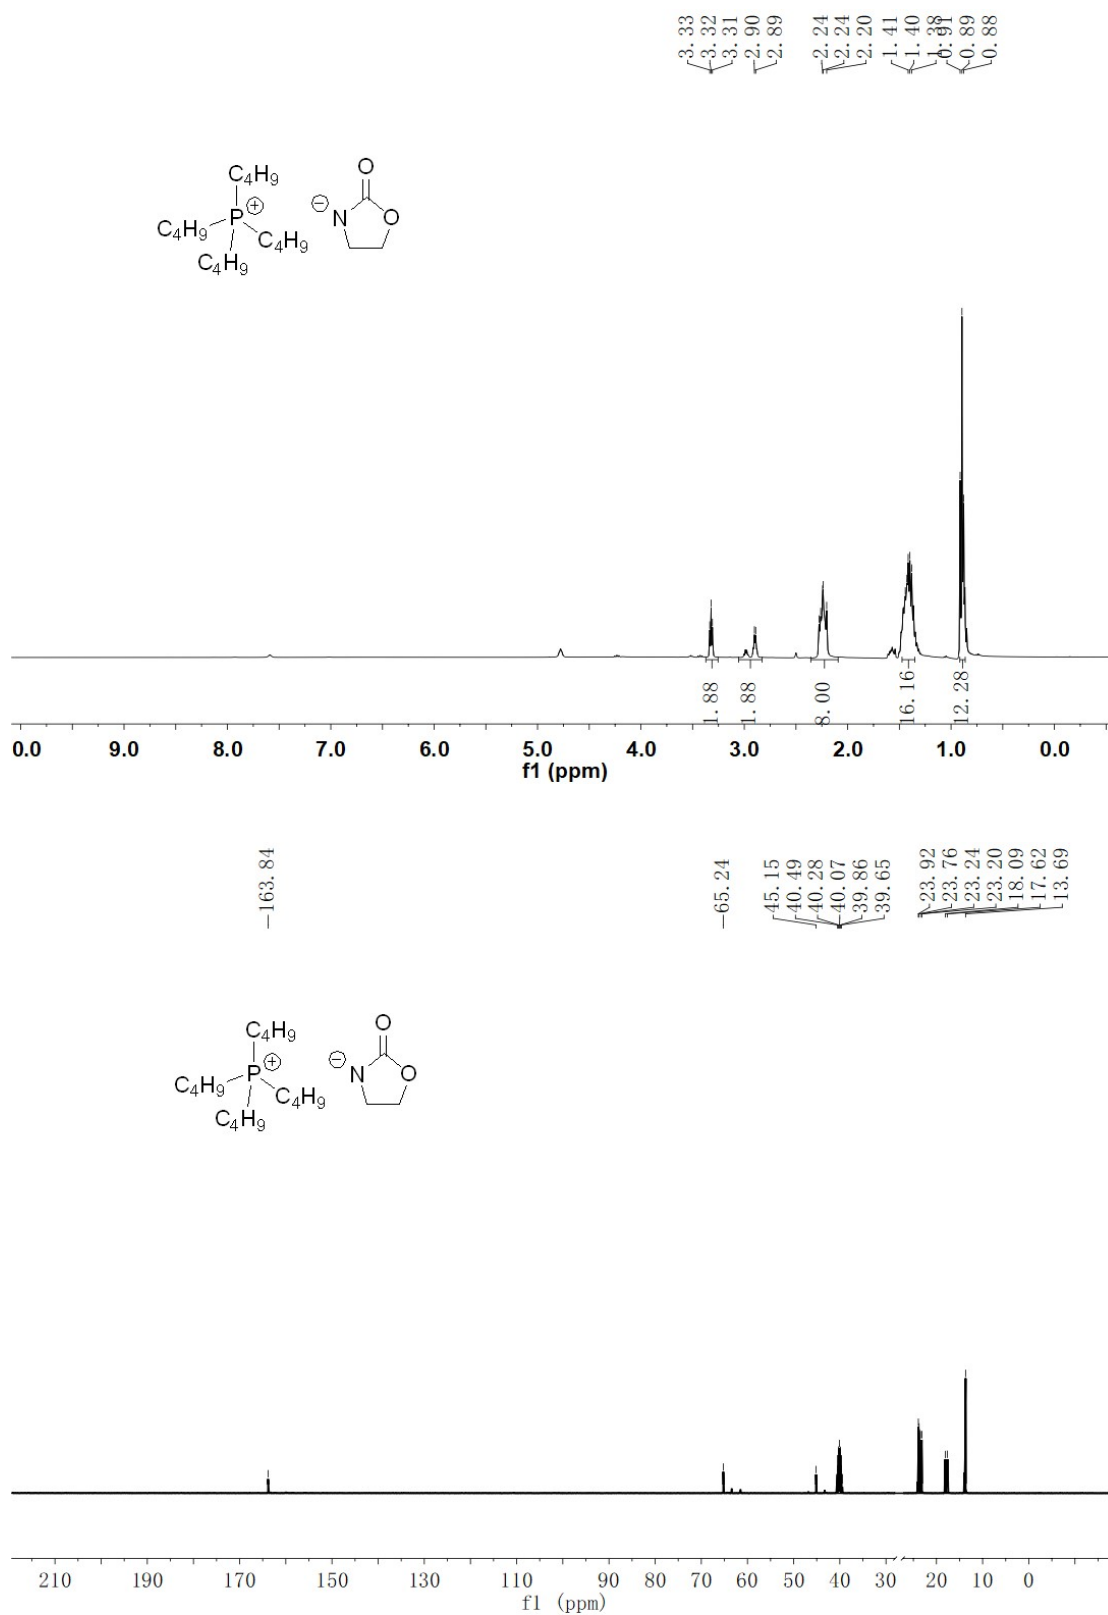

**Figure S4.**  $^1H$  NMR and  $^{13}C$  NMR spectra of  $[P_{4444}][Oxa]$

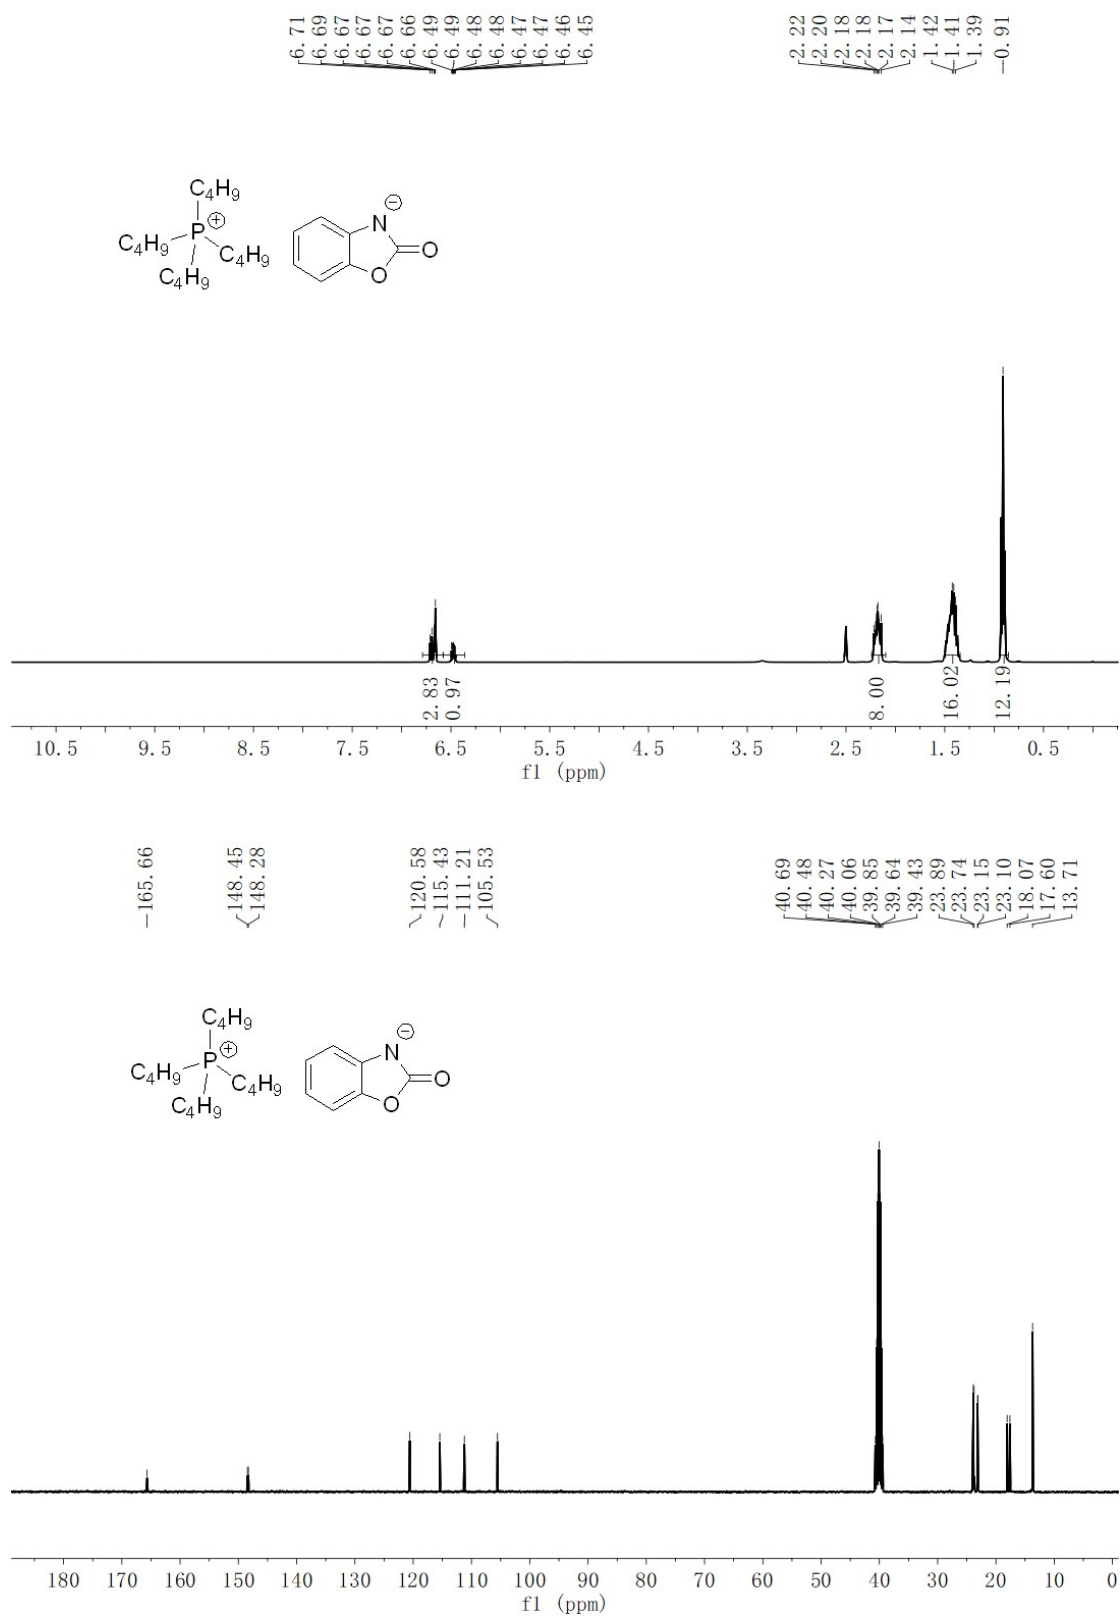

**Figure S5.** <sup>1</sup>H NMR and <sup>13</sup>C NMR spectra of [P<sub>4444</sub>][Benoxa]

2.  $^1\text{H}$  and  $^{13}\text{C}$  NMR spectra of the products, Figure S6-S13

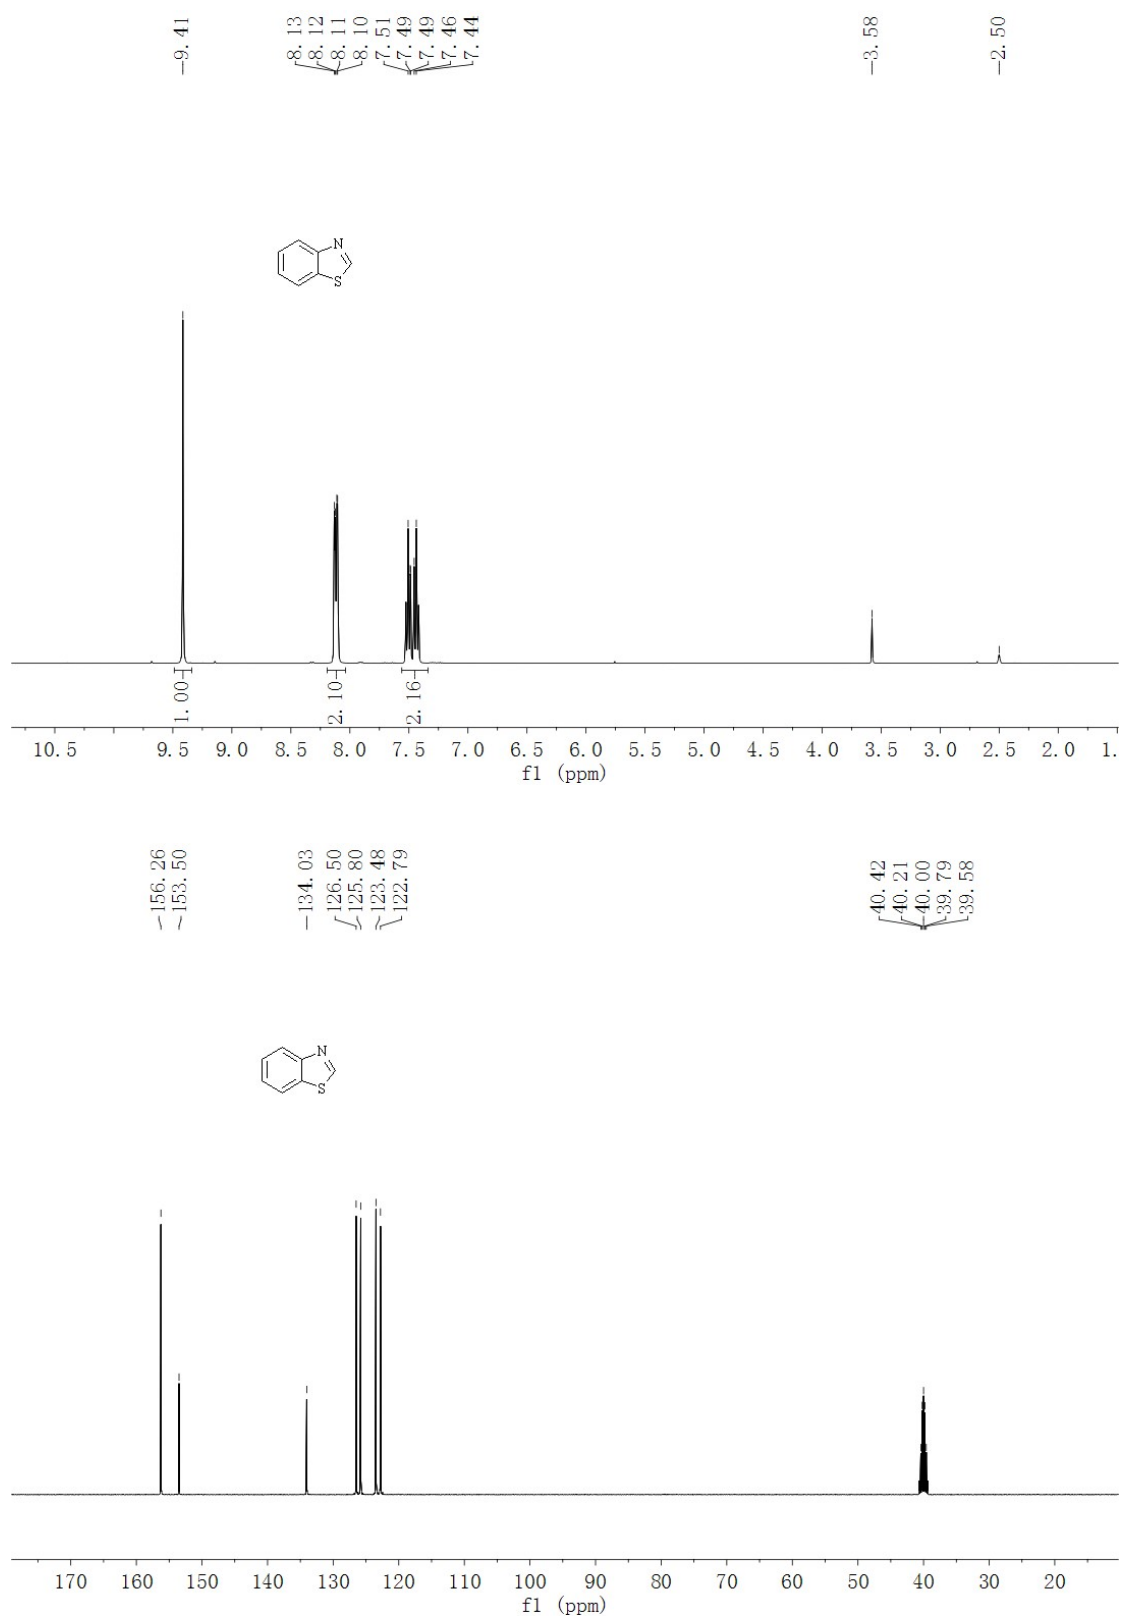

Figure S6.  $^1\text{H}$  NMR and  $^{13}\text{C}$  NMR spectra of benzothiazole

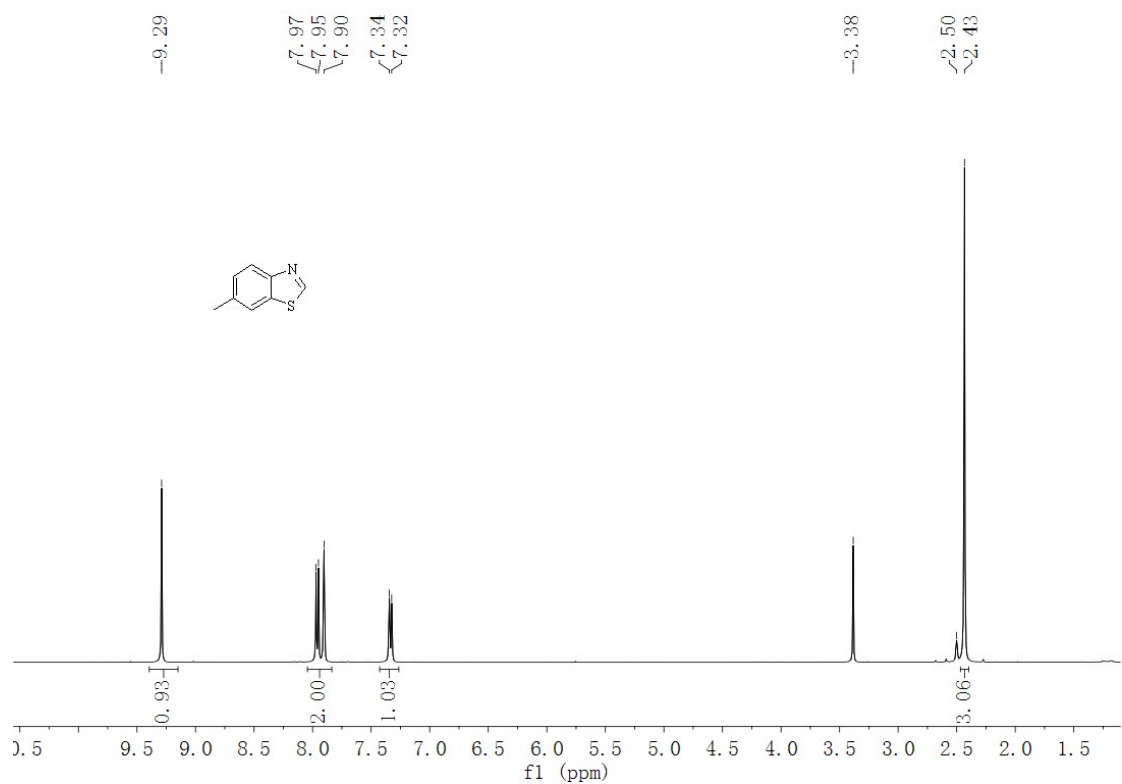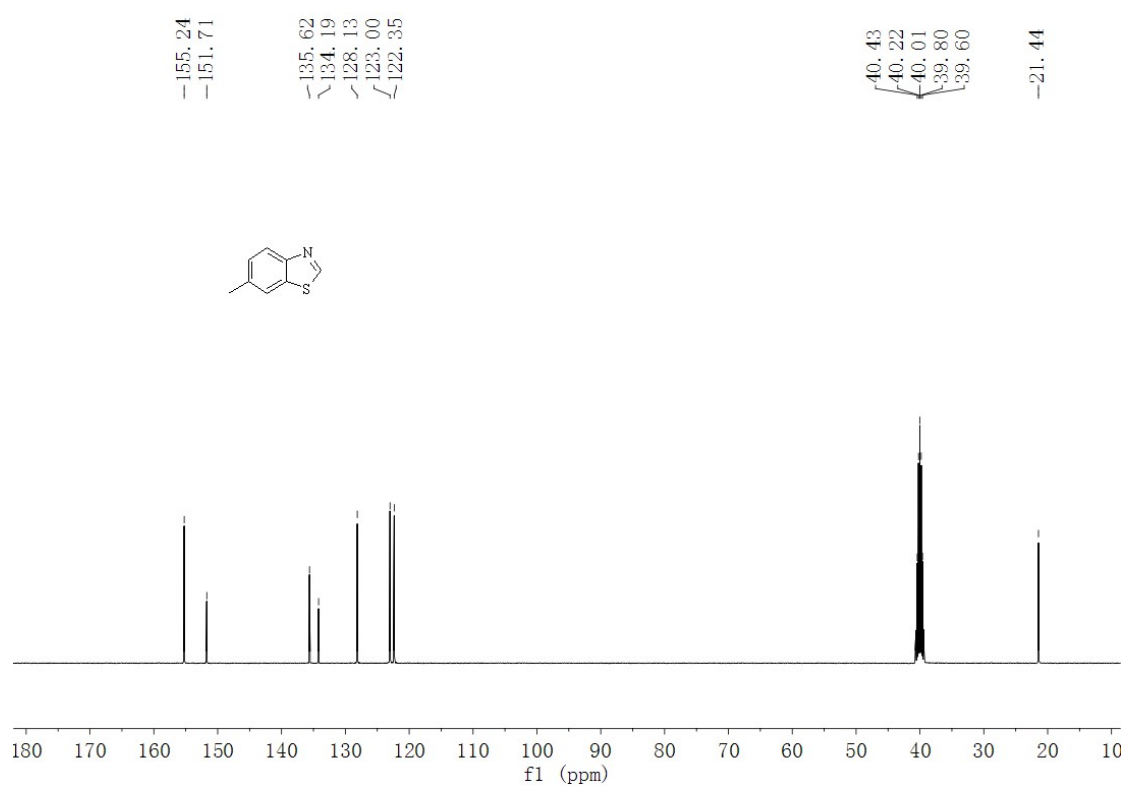

**Figure S7.** <sup>1</sup>H NMR and <sup>13</sup>C NMR spectra of 5-methylbenzothiazole



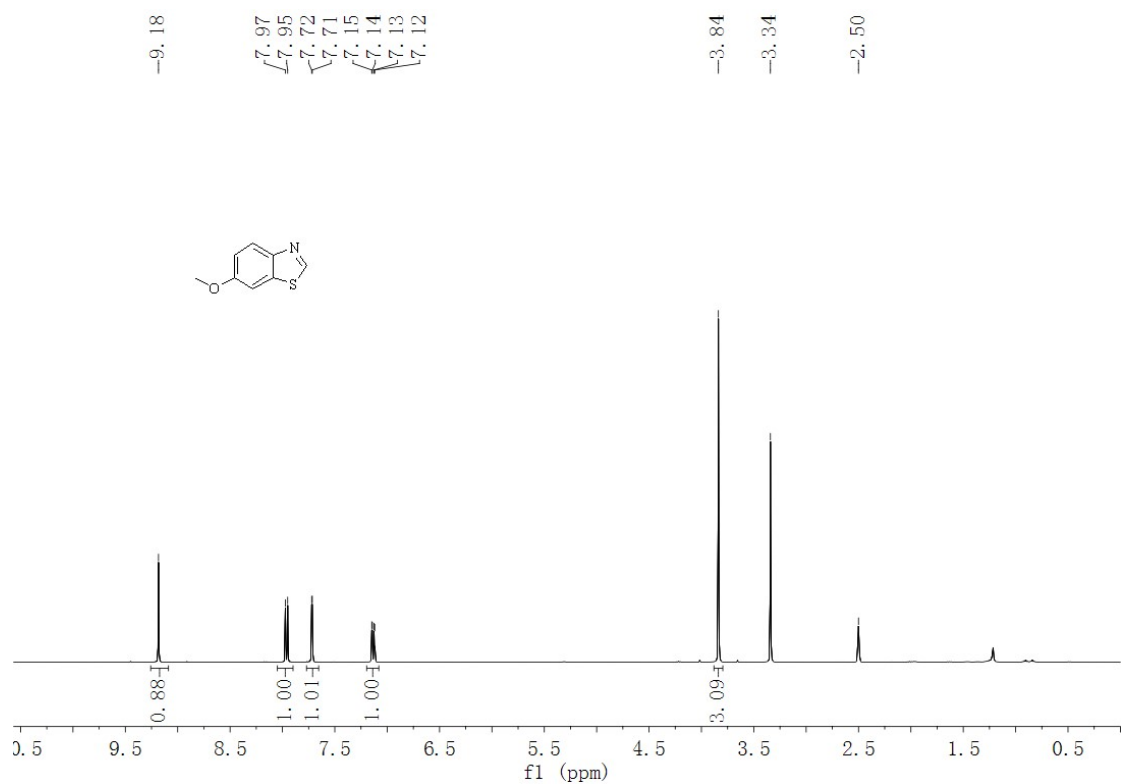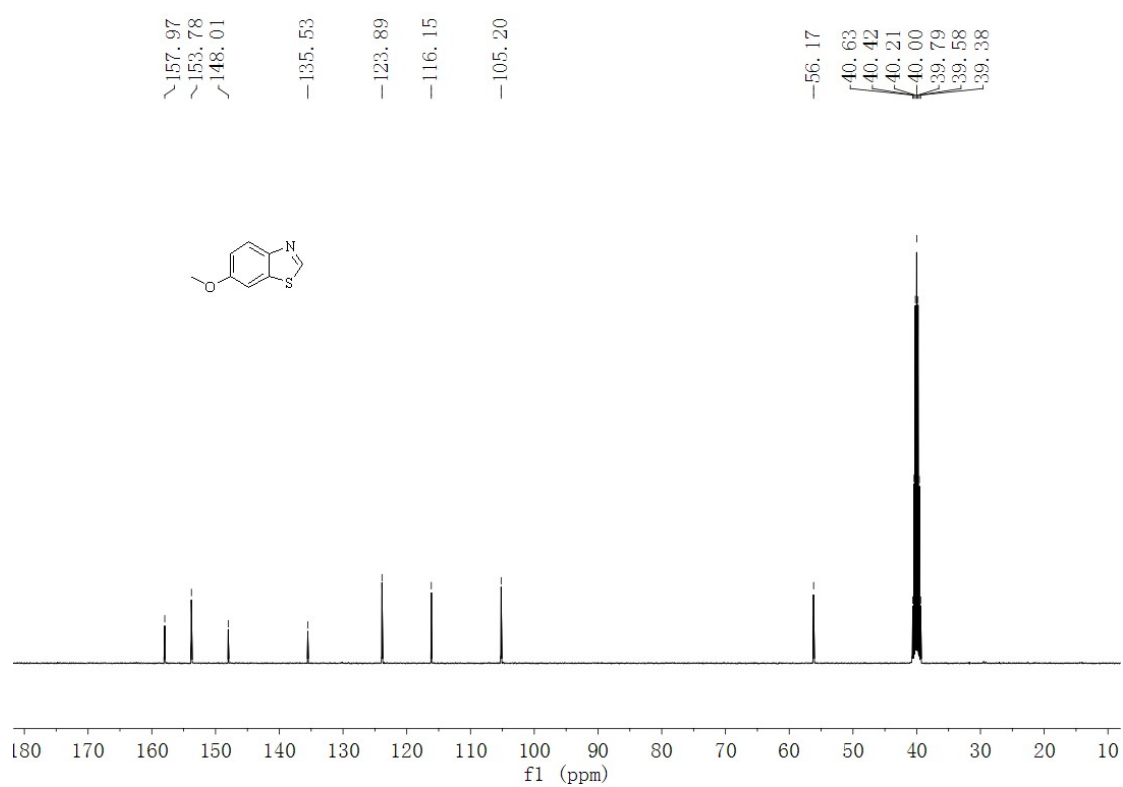

**Figure S8.** <sup>1</sup>H NMR and <sup>13</sup>C NMR spectra of 5-methoxybenzothiazole

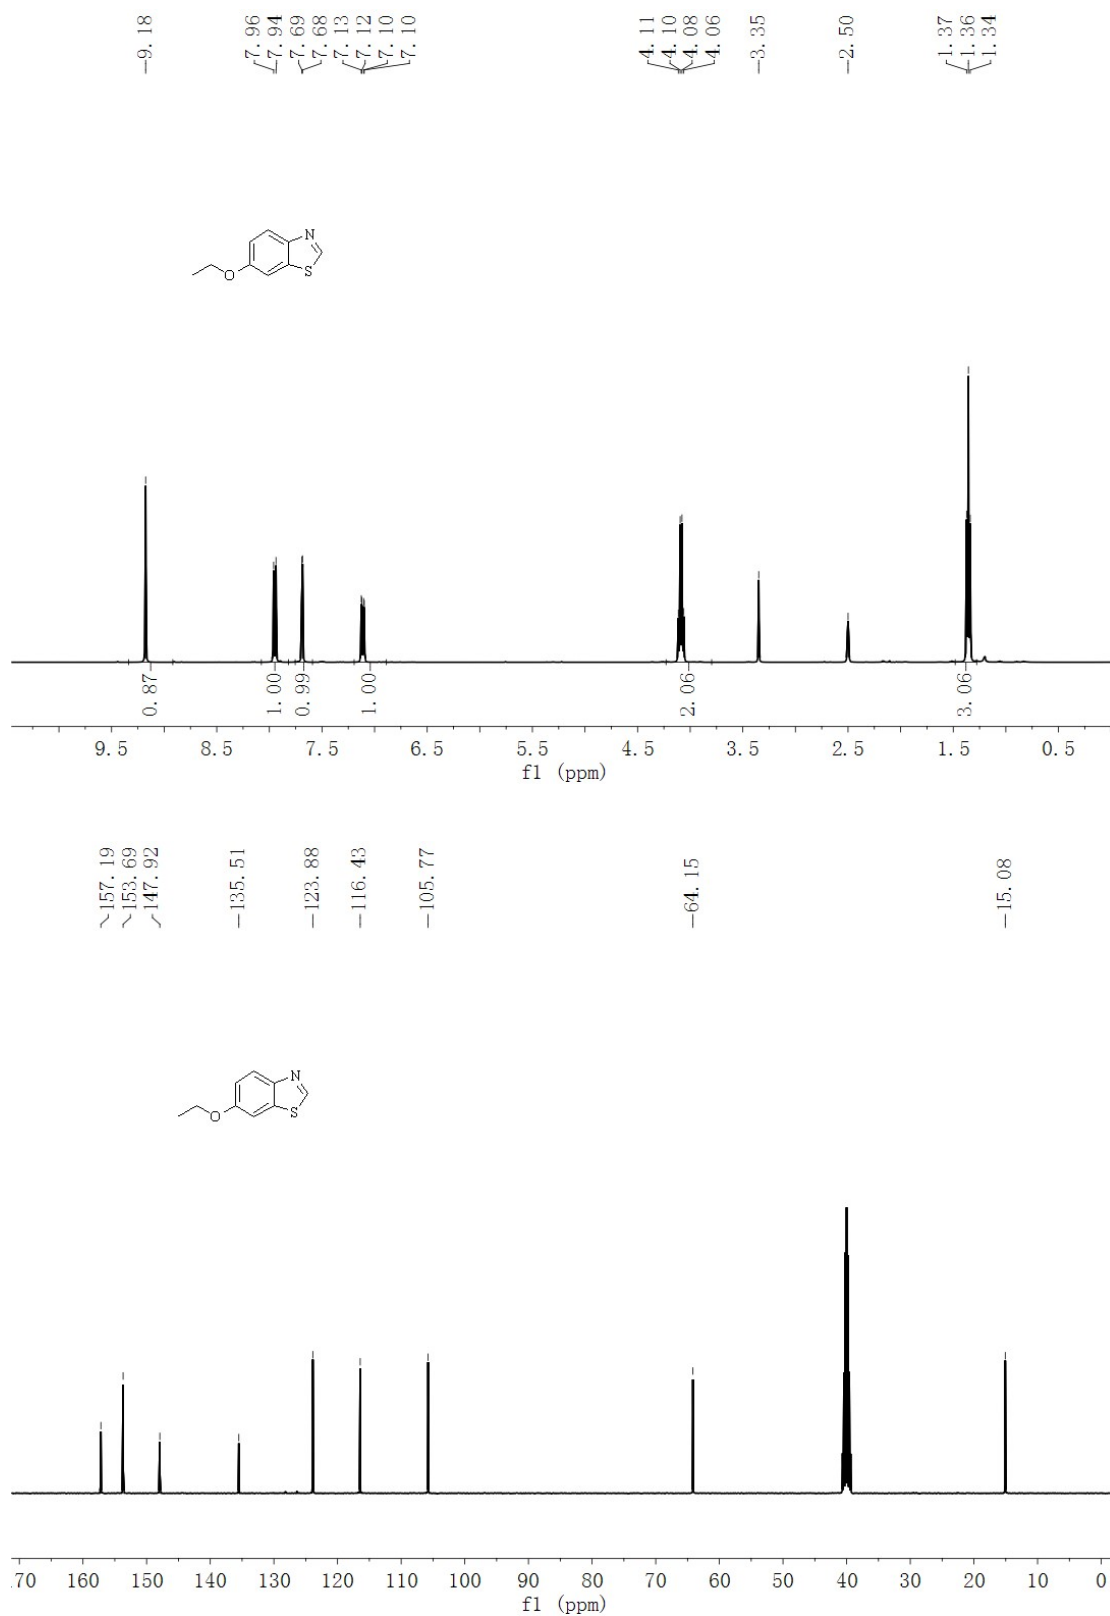

**Figure S9.** <sup>1</sup>H NMR and <sup>13</sup>C NMR spectra of 5-ethoxybenzothiazole

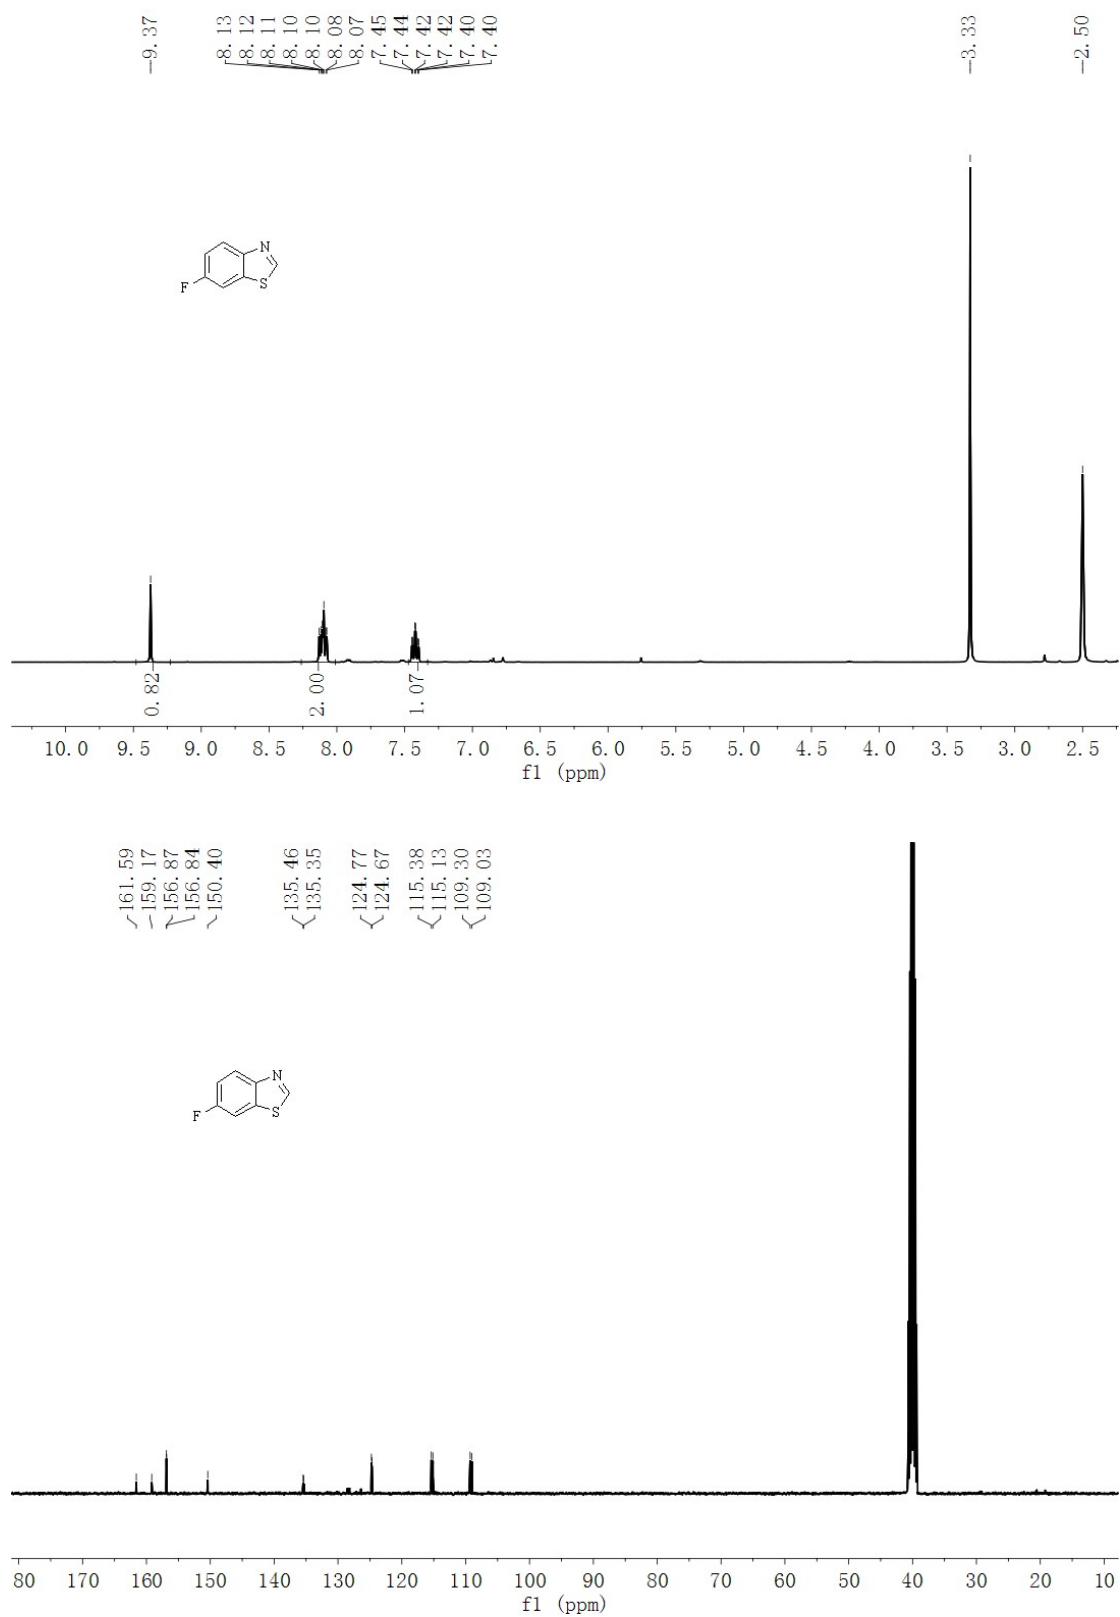

**Figure S10.** <sup>1</sup>H NMR and <sup>13</sup>C NMR spectra of 5-fluorobenzothiazole

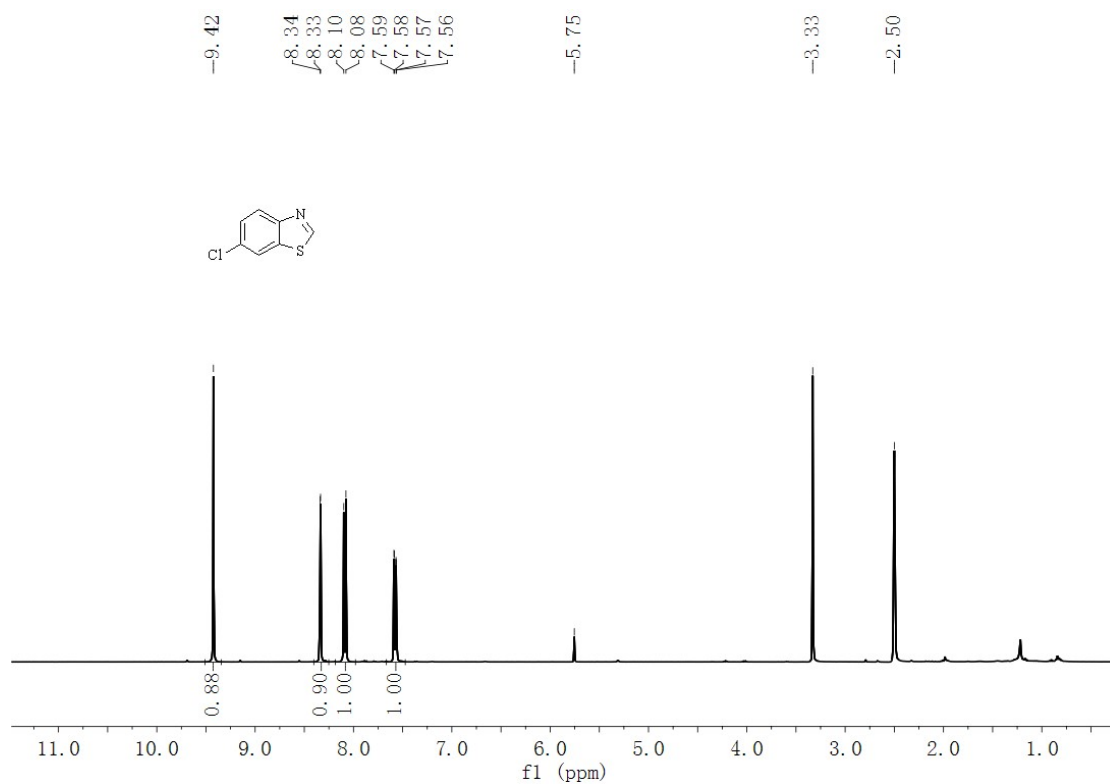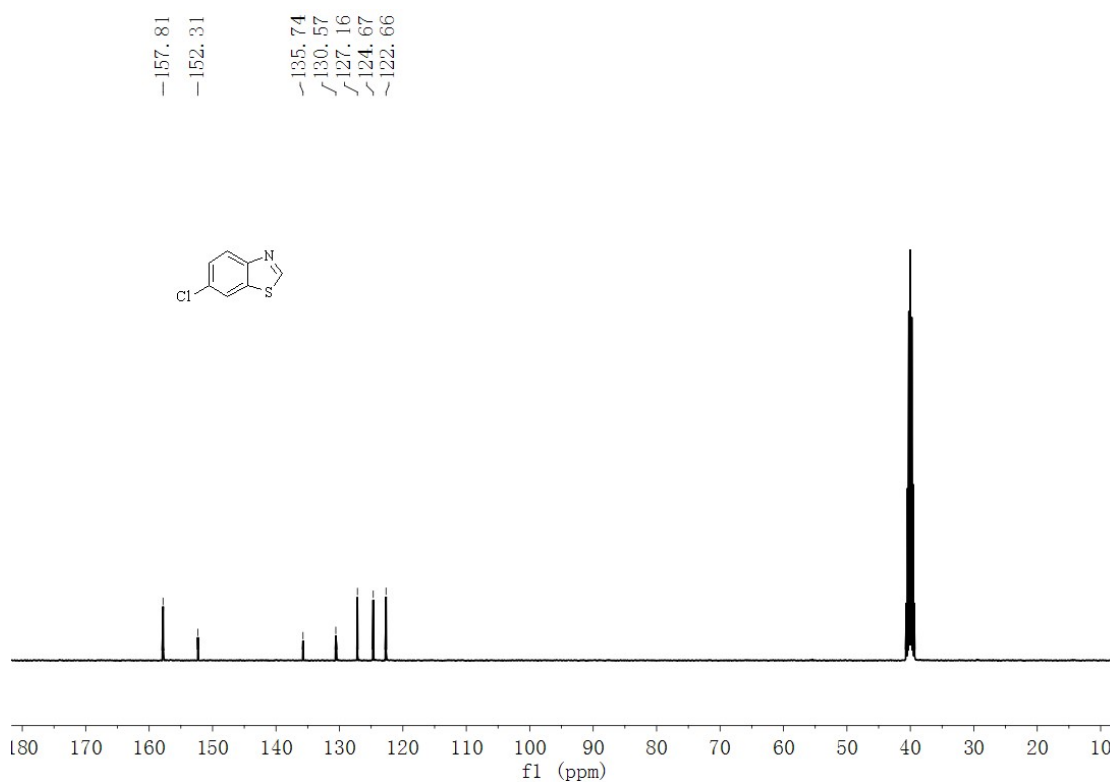

**Figure S11.**  $^1\text{H}$  NMR and  $^{13}\text{C}$  NMR spectra of 5-chlorobenzothiazole

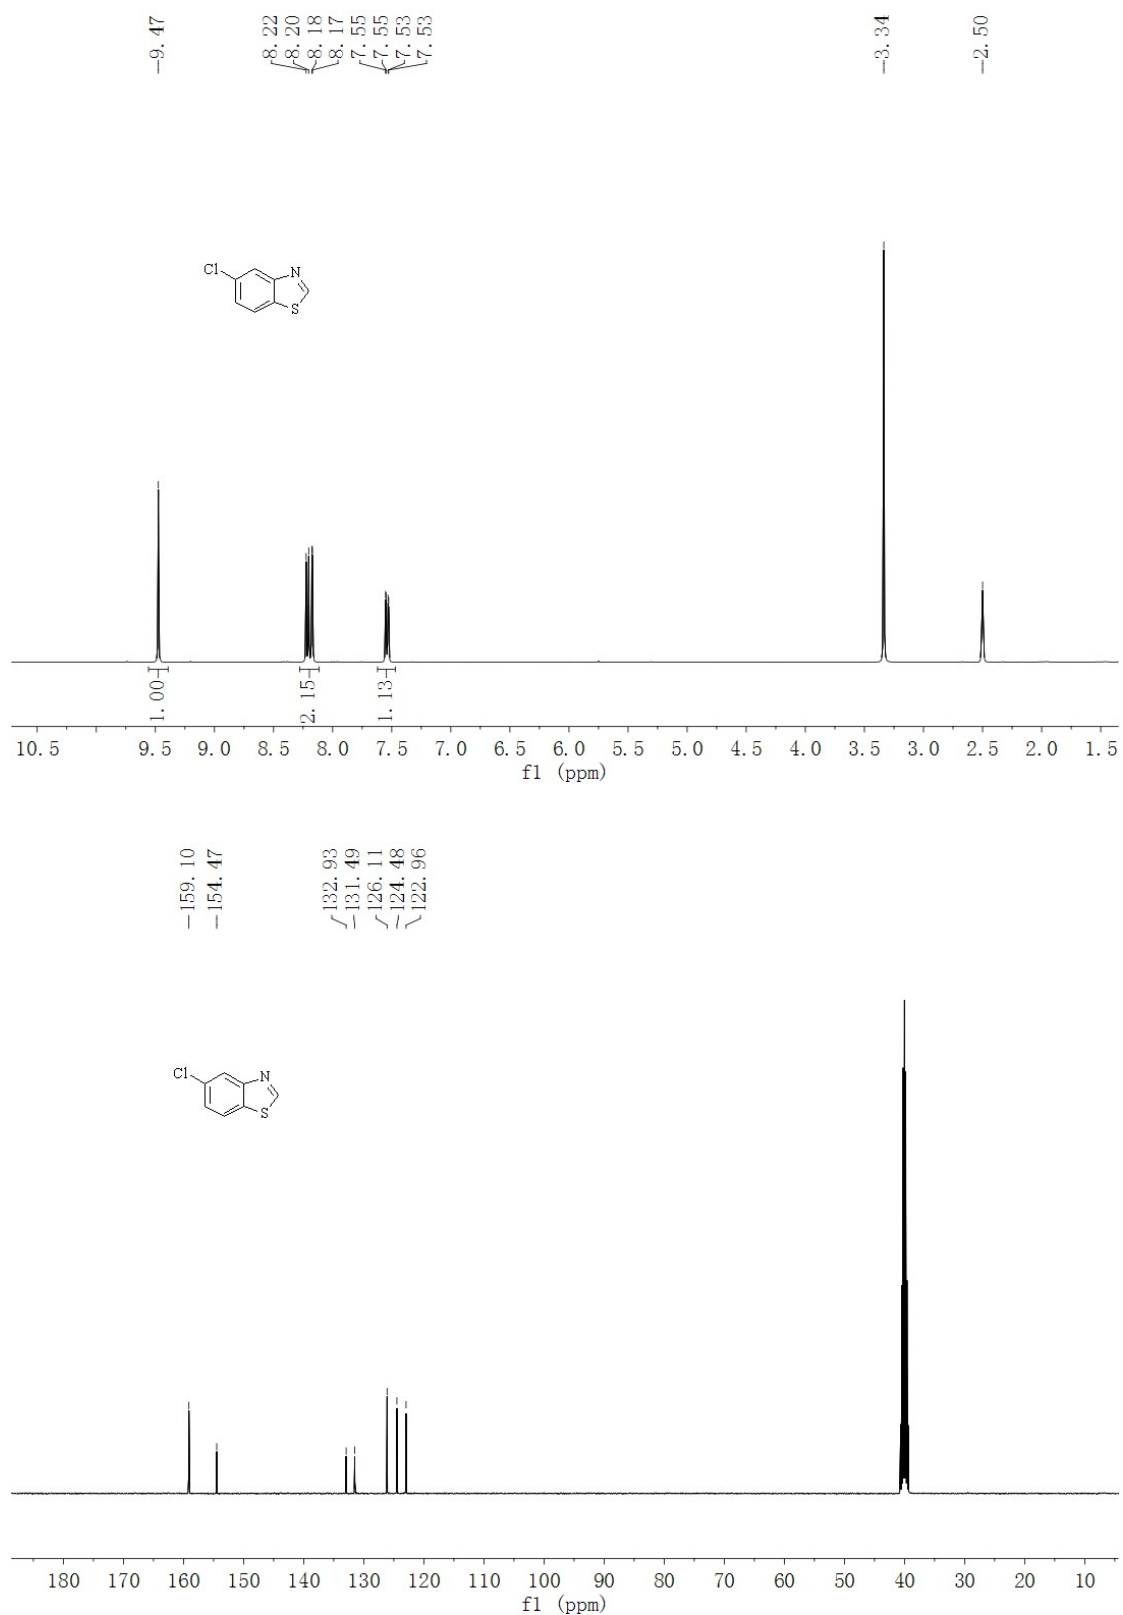

**Figure S12.** <sup>1</sup>H NMR and <sup>13</sup>C NMR spectra of 6-chlorobenzothiazole

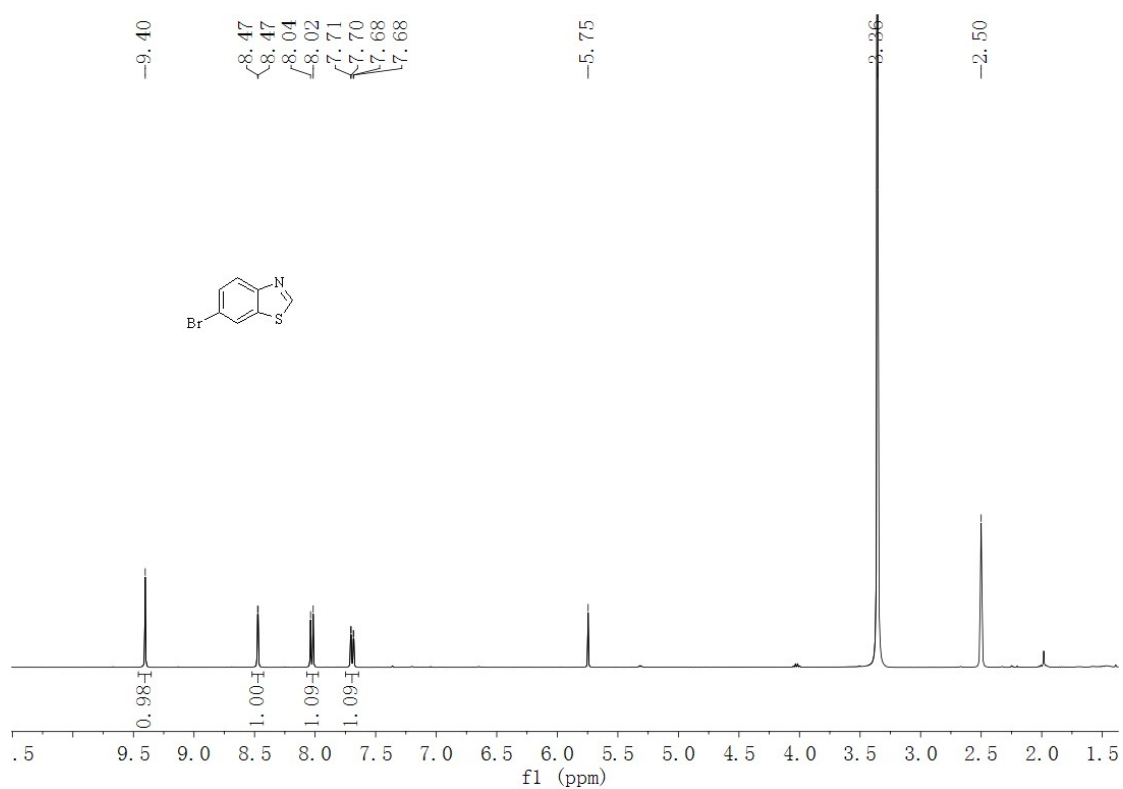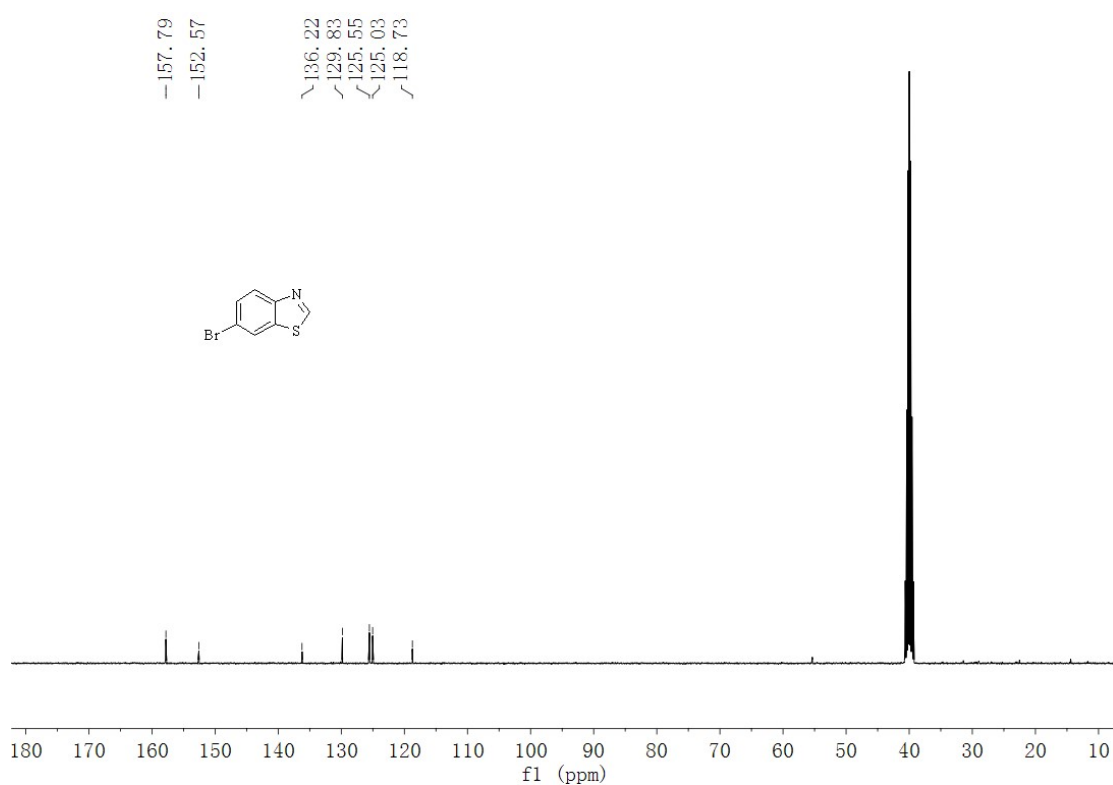

**Figure S13.**  $^1\text{H}$  NMR and  $^{13}\text{C}$  NMR spectra of 5-bromobenzothiazole
